# Supplementary material for: Association of MTHFR Polymorphisms with H-Type Hypertension: A Systemic Review and Network Meta-Analysis of Diagnostic Test Accuracy
Source: Int J Hypertens. 2022 Mar 22;2022:2861444. doi: 10.1155/2022/2861444 (PMC8964216; doi:10.1155/2022/2861444)
Supplement: Supplementary Materials — Supplementary Figure 1: PRISMA flow diagram of literature search and selection. Supplementary Figure 2: forest plot of MTHFR C667T rs1801133. Supplementary Figure 3: Forest plot of MTHFR A1298C rs1801131. Supplementary Figure 4: Begg's funnel plot and Egger's test. Supplementary Figure 5: SROC curve. Supplementary Figure 6: network evidence plot for H-hypertension. Supplementary Figure 7: risk ratio and 95% CI. Supplementary Figure 8: rank probability. Supplementary Table 1: quality evaluation results. Supplementary Table 2: characteristics of studies included in the meta-analysis. Supplementary Table 3: false-positive report probability (FPRP) for selected genetic model. [file 2861444.f1.docx]

**Supplementary Figure 1. PRISMA flow diagram of literature search and selection**

Duplicate records

(n=145)

Additional records identified through other sources
(n = 0 )

228 of records identified through databases searching

(PubMed(n=1) ,Embase(n=1),

Cochrance(n=12) CNKI(n=54),WanFang n=72）VIP(n=41),CBM(n=47)

(n =228)

Full-text articles excluded,

Non-case control study

(n =5 )

Combined with other diseases studies(n=7)

Fail to find out full article

(n=2)
letter, Conference reports, overview, Research progress (n=7)

lack of allele frequencies

(n=4)

Irrelevant research(n=6)

Records excluded

After reading abstract and title
(n =38)

Full-text articles assessed for eligibility
(n =14 )

Records screened
(n =45 )

Records after duplicates removed
(n =83)

**Supplementary Figure.2 Forest plot of MTHFRC667T rs1801133**

**Supplementary Figure.3 Forest plot of MTHFR A1298C rs1801131**

**Supplementary Figure 4. Begg’s funnel plot and Egger’s test**


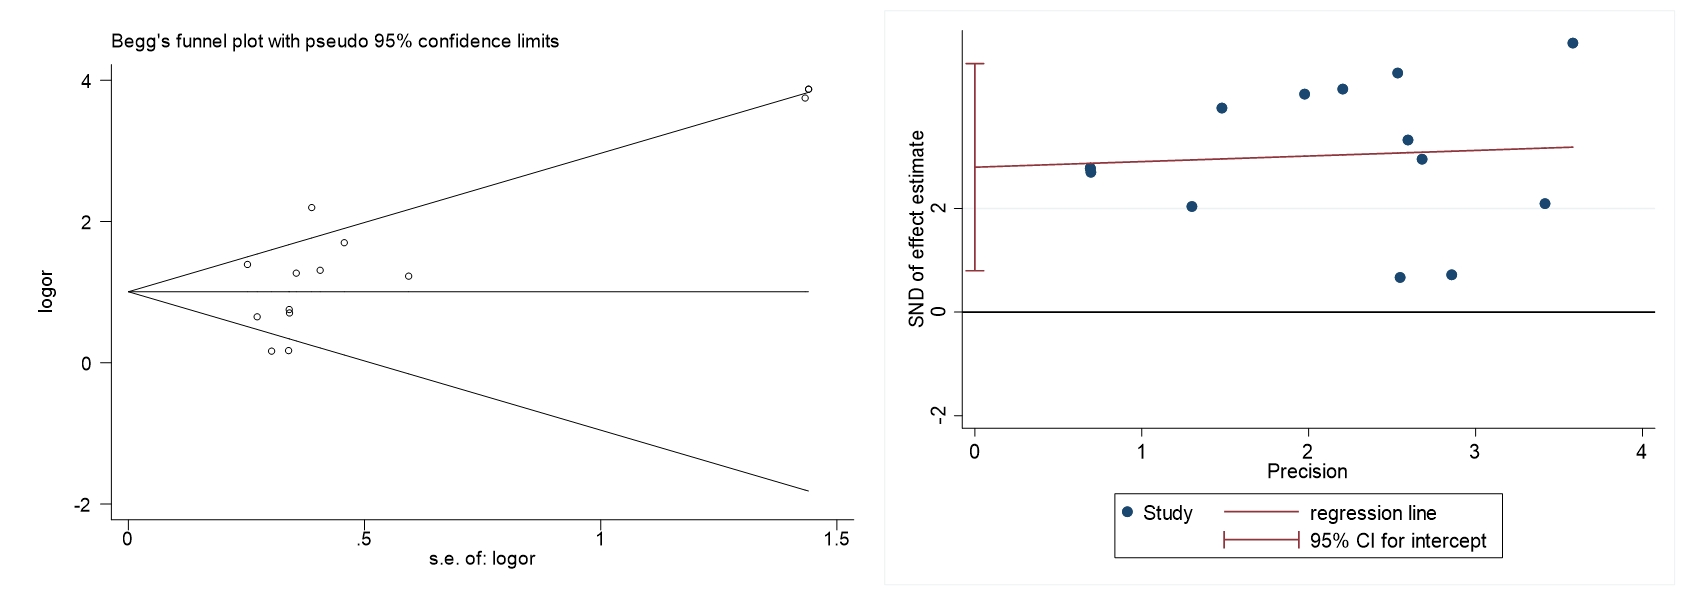


**Supplementary Figure 5. SROC curve**


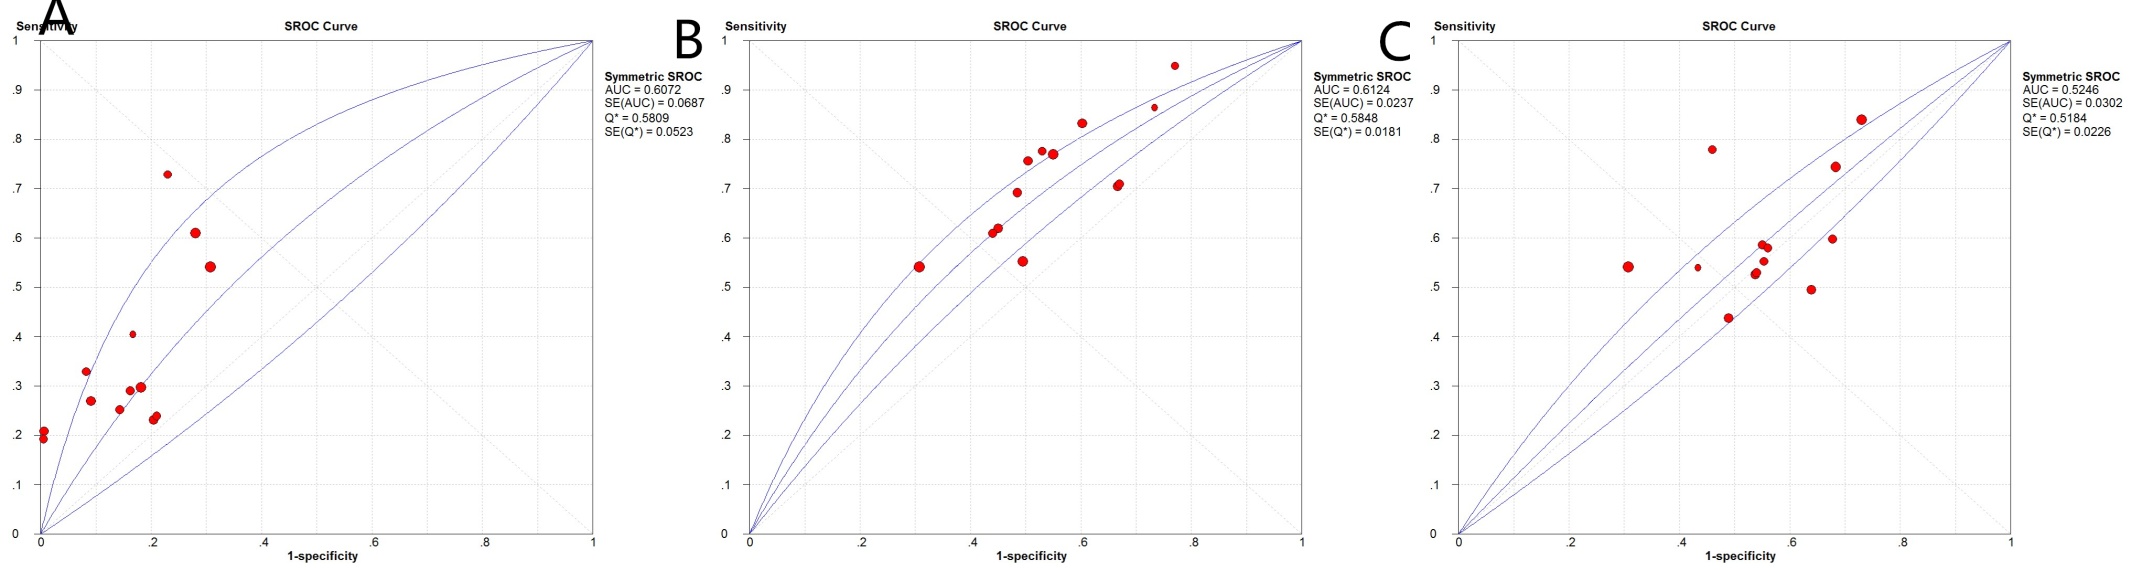


**NOTE**:A=dominant model. B=recessive model. C=over-dominant model

**Supplementary Figure 6. Network evidence plot for H-hypertension**


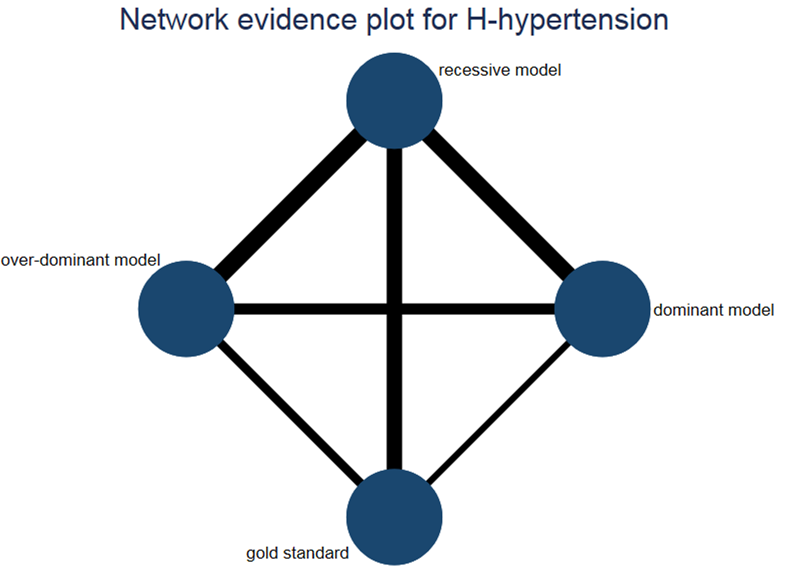


**Supplementary Figure 7. risk ratio and 95%CI**

| A | 1.69(1.45,1.97) | 3.01(2.55,3.56) | 1.41（1.22,1.64） |
| --- | --- | --- | --- |
| 2.24(1.96,2.56) | B | 1.78（1.50,2.11） | 0.84（0.72,0.98） |
| 1.21(1.07,1.36) | 0.54(0.47,0.62) | C | 0.47(0.40,0.56) |
| 2.14(1.88,2.45) | 0.96(0.83,1.11) | 1.78(1.55,2.03) | D |
| **NOTE：**Sensitivity（pper right），Specificity（Left below）；A= dominant model，B= recessive model, C= over dominant model, D= gold standard | | | |

**Supplementary Figure 8. Rank probability**

| **Supplementary Table 1 The quality evaluation results** | | | | | | | | | |
| --- | --- | --- | --- | --- | --- | --- | --- | --- | --- |
| Study id | ① | ② | ③ | ④ | ⑤ | ⑥ | ⑦ | ⑧ | Score |
| Zhengyu Cao | 1 | 1 | 1 | 0 | 0 | 1 | 1 | 1 | 6 |
| Chunfang LV | 1 | 1 | 1 | 0 | 0 | 1 | 1 | 1 | 6 |
| Shaoyan Zhu | 1 | 1 | 1 | 0 | 0 | 1 | 1 | 1 | 6 |
| Jia Wang | 1 | 1 | 1 | 0 | 1 | 1 | 1 | 1 | 7 |
| Lei Chen | 1 | 1 | 1 | 0 | 1 | 1 | 1 | 1 | 7 |
| Congna Li | 1 | 1 | 1 | 0 | 0 | 1 | 1 | 1 | 6 |
| Zhi Tang | 1 | 1 | 1 | 0 | 0 | 1 | 1 | 1 | 6 |
| Yingying Zhang | 1 | 1 | 1 | 0 | 0 | 1 | 1 | 1 | 6 |
| Fang An | 1 | 1 | 1 | 0 | 1 | 1 | 1 | 1 | 7 |
| Jing Qian | 1 | 1 | 1 | 0 | 1 | 1 | 1 | 1 | 7 |
| Hanshu Zhang | 1 | 1 | 1 | 0 | 0 | 1 | 1 | 1 | 6 |
| Suyan Bian | 1 | 1 | 1 | 0 | 0 | 1 | 1 | 1 | 6 |
| Xiaoye Su | 1 | 1 | 1 | 0 | 0 | 1 | 1 | 1 | 6 |
| Xiaohui Lin | 1 | 1 | 1 | 0 | 0 | 1 | 1 | 1 | 6 |
| **Note:**①Whether the exposed genes were clearly defined; ② whether the genotyping method was described;③whether HWE was considered in the control group; ④ whether the genotype was inferred; ⑤whether the population stratification method was described; ⑥ whether the diagnostic criteria were clear; ⑦ whether the data were sufficient; ⑧whether the statistical methods and software were described | | | | | | | | | |

| | **Supplementary Table 2** Characteristics of studies included in the meta-analysis | | | | | | | | | | | | --- | --- | --- | --- | --- | --- | --- | --- | --- | --- | --- | | Study id | Year | Country | Detection method | Case |  |  | Control |  |  | P for HWE | | MTHFR C677T rs1801133 | |  |  | TT | TC | CC | TT | TC | CC |  | | Zhengyu Cao | 2012 | China | PCR | 26 | 53 | 33 | 30 | 68 | 49 | 0.767 | | Chunfang LV | 2014 | China | PCR-RFLP | 31 | 62 | 57 | 0 | 36 | 44 | 0.45 | | Shaoyan Zhu | 2015 | China | PCR-RFLP | 24 | 47 | 29 | 21 | 46 | 33 | 0.568 | | Jia Wang | 2015 | China | PCR-RFLP | 28 | 24 | 42 | 52 | 91 | 144 | 0.141 | | Lei Chen | 2016 | China | PCR-RFLP | 15 | 17 | 5 | 5 | 17 | 8 | 0.726 | | Congna Li | 2016 | China | PCR | 44 | 68 | 32 | 12 | 43 | 54 | 0.443 | | Zhi Tang | 2017 | China | PCR-RFLP | 19 | 42 | 39 | 0 | 44 | 56 | 0.536 | | Yingying Zhang | 2017 | China | PCR-RFLP | 50 | 104 | 31 | 8 | 45 | 35 | 0.22 | | Fang An | 2018 | China | PCR-RFLP | 34 | 47 | 36 | 16 | 32 | 51 | 0．251 | | Jing Qian | 2018 | China | AS-PCR | 28 | 56 | 27 | 17 | 43 | 59 | 0.1 | | Hanshu Zhang | 2019 | China | PCR | 28 | 38 | 19 | 7 | 38 | 40 | 0.626 | | Suyan Bian | 2019 | China | PCR | 43 | 13 | 3 | 20 | 47 | 20 | 0.756 | | Xiaoye Su | 2019 | China | PCR-RFLP | 183 | 48 | 69 | 28 | 27 | 45 | 0.13 | |  |  |  |  |  |  |  |  |  |  |  | | MTHFR A1298C rs1801131 | | |  | AA | AC | CC | AA | AC | CC |  | | Xiaohui Lin | 2012 | China | PCR-RFLP | 54 | 17 | 9 | 42 | 15 | 8 | 0.82 | | Hanshu Zhang | 2019 | China | PCR | 54 | 26 | 5 | 58 | 22 | 5 | 0.158 | |  |
| --- | --- | --- | --- | --- | --- | --- | --- | --- | --- | --- | --- | --- | --- | --- | --- | --- | --- | --- | --- | --- | --- | --- | --- | --- | --- | --- | --- | --- | --- | --- | --- | --- | --- | --- | --- | --- | --- | --- | --- | --- | --- | --- | --- | --- | --- | --- | --- | --- | --- | --- | --- | --- | --- | --- | --- | --- | --- | --- | --- | --- | --- | --- | --- | --- | --- | --- | --- | --- | --- | --- | --- | --- | --- | --- | --- | --- | --- | --- | --- | --- | --- | --- | --- | --- | --- | --- | --- | --- | --- | --- | --- | --- | --- | --- | --- | --- | --- | --- | --- | --- | --- | --- | --- | --- | --- | --- | --- | --- | --- | --- | --- | --- | --- | --- | --- | --- | --- | --- | --- | --- | --- | --- | --- | --- | --- | --- | --- | --- | --- | --- | --- | --- | --- | --- | --- | --- | --- | --- | --- | --- | --- | --- | --- | --- | --- | --- | --- | --- | --- | --- | --- | --- | --- | --- | --- | --- | --- | --- | --- | --- | --- | --- | --- | --- | --- | --- | --- | --- | --- | --- | --- | --- | --- | --- | --- | --- | --- | --- | --- | --- | --- | --- | --- | --- | --- | --- | --- | --- | --- | --- | --- | --- | --- | --- | --- | --- | --- | --- | --- | --- | --- | --- | --- | --- | --- | --- | --- | --- | --- | --- | --- | --- | --- | --- | --- | --- | --- | --- | --- | --- | --- |

| **Supplementary Table3**  False positive report probability (FPRP) for selected genetic model | | |
| --- | --- | --- |
| Genetic model | OR(95%CI) | FPRP prior probability |
| allele contrast model | 2.17(1.77-2.66) | 0.00 |
| homozygous model | 4.36(2.74-6.96) | 0.149 |
| heterozygous model | 1.59(1.28-1.96) | 0.045 |
| dominant model | 2.19(1.76-2.73) | 0.00 |
| recessive model | 3.23(2.14-4.87) | 0.148 |
| over-dominant model | 1.08(0.85-1.36) | 0.998 |
